# Supplementary material for: Electrostatic fabrication of RGO-g-SSS/CdTe graphene/quantum dot nanocomposites with enhanced optoelectronic properties
Source: Royal Society of Chemistry journal article supplement (doi:10.1039/c6ra11104a), 2016-01-01
Supplement: c6ra11104a1.pdf [file c6ra11104a1.pdf]

## Supporting Information

### Electrostatic Fabrication of RGO-g-SSS/CdTe Graphene/Quantum Dot Nanocomposites with Enhanced Optoelectronic Properties

Yan Zhang, Xing-Jin She, Cai-Feng Wang, Su Chen\*

State Key Laboratory of Materials-Oriented Chemical Engineering and College of Chemistry and Chemical Engineering, Nanjing Tech University (former Nanjing University of Technology), 5 Xin Mofan Road, Nanjing 210009, P. R. China. E-mail: chensu@njtech.edu.cn

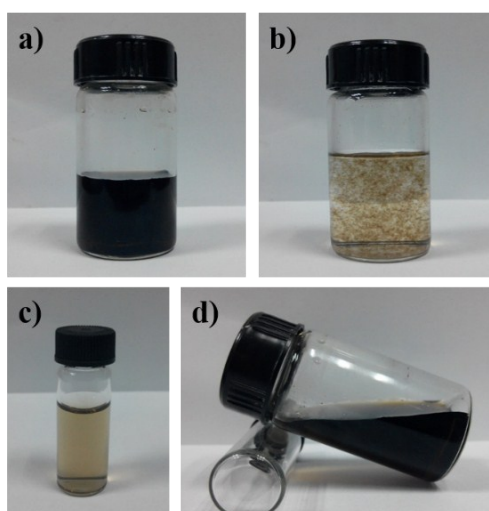

**Fig. S1** (a) Solution obtained after polymerization of SSS in the presence of reduced graphene for 24 h, and the vial was placed statically for around 2 months (d). (b) The solution was precipitated by adding it into methanol. (c) The RGO-g-SSS solid was redissolved in H<sub>2</sub>O.

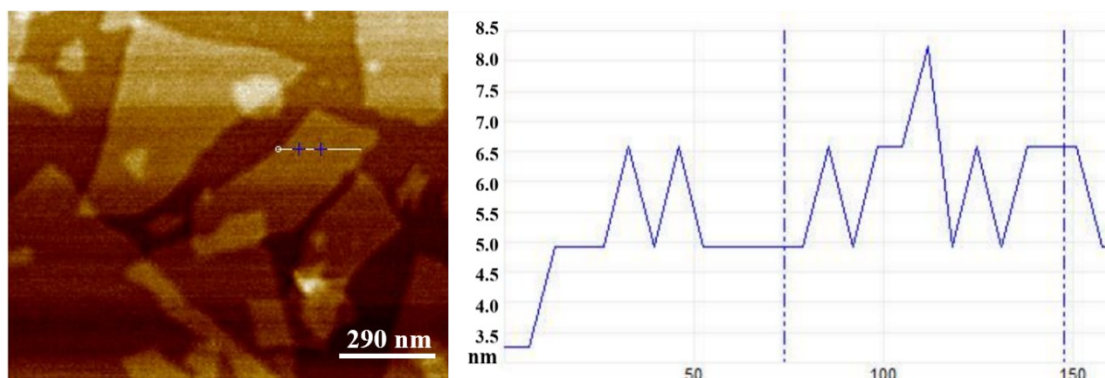

**Fig. S2** AFM image of the single layers of RGO-g-SSS.

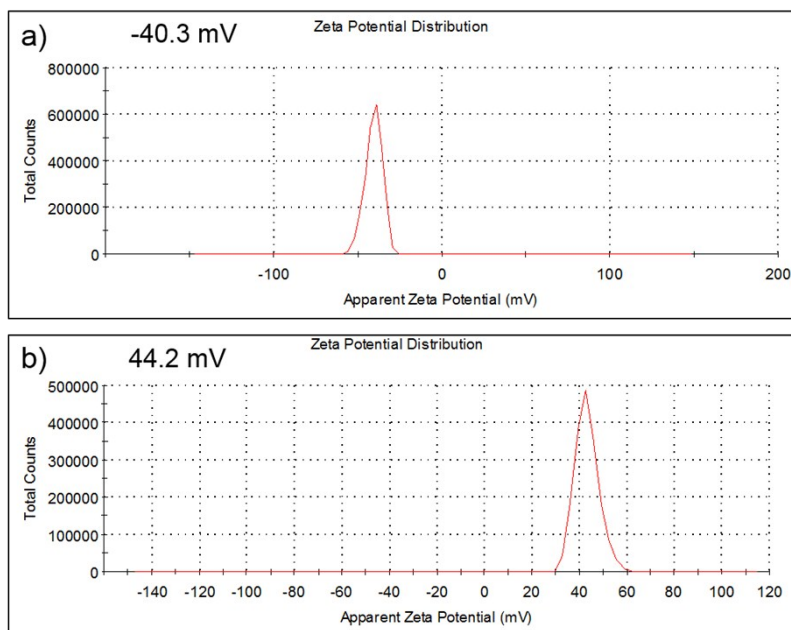

**Fig. S3** Zeta potential distribution of a) RGO-g-SSS composites and b) amino-modified CdTe QDs.

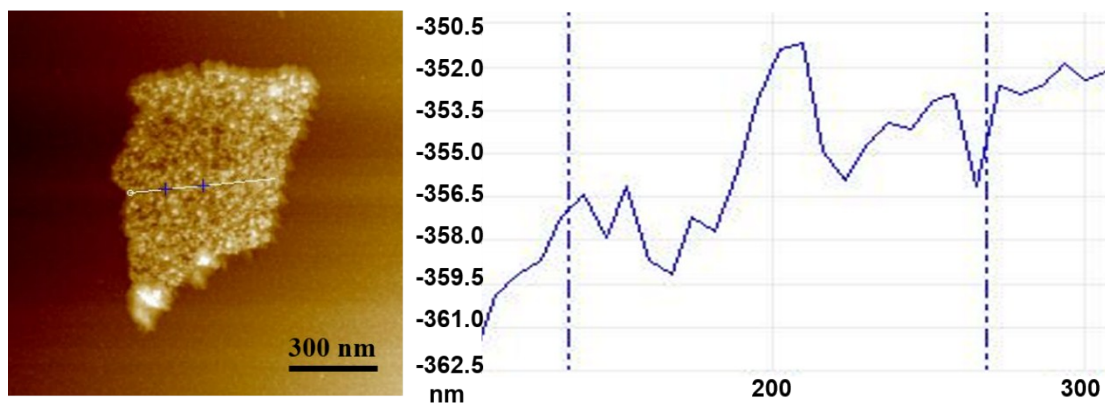

**Fig. S4** AFM image of the single layers of RGO-g-SSS/CdTe nanocomposites.

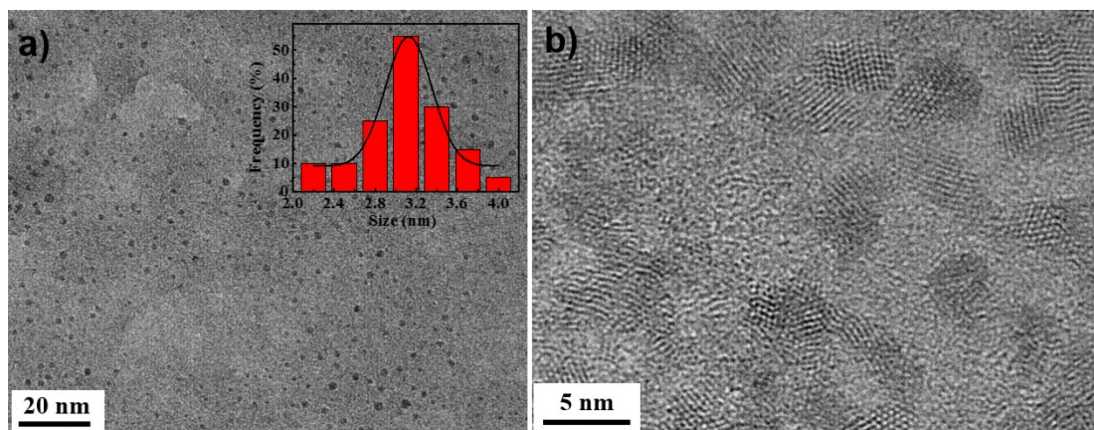

**Fig. S5** (a) TEM image and size-distribution diagram (inset) and (b) HRTEM micrograph of CdTe QDs.

The water-phase QDs can be well scattered in the water mainly through a mutual electrostatic repulsive force, as shown in Fig. S5a; the as-prepared amino-modified CdTe QDs are relatively uniform and well-dispersed without obvious aggregation. The mean size of the CdTe QDs was measured to be about 3.2 nm, corresponding to the standards of QDs. The size-distribution diagram (inset) further indicates that the QDs have relatively narrow size distribution. Moreover, the high-resolution TEM (HRTEM) image of the CdTe nanoparticles (Fig. S5b) demonstrates that the QDs are highly crystalline through the observation of lattice planes.

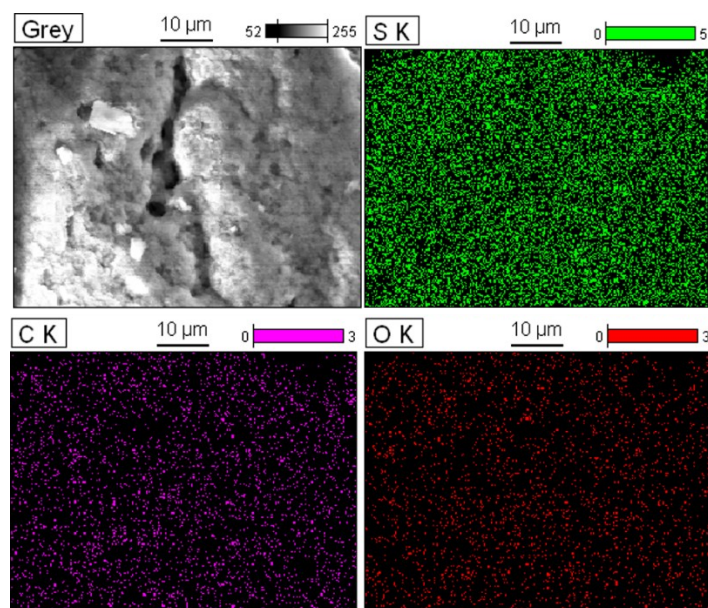

**Fig. S6** EDX mapping images of RGO-g-SSS composites.

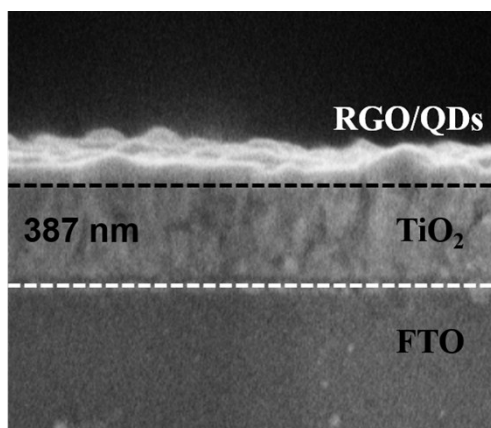

**Fig. S7** SEM image of the cross section of the photo-electrode in RGO-g-SSS/CdTe sensitized solar cell.
